# Supplementary material
Source: PubMed Central journal article supplement (PMC9335347)
Supplement: mmc3.pdf [file mmc3.pdf]

## RAPID SARS-COV-2 ANTIGEN TEST CARD

### INSTRUCTION GUIDE FOR ANTERIOR NASAL SWAB SPECIMENS

#### For self-testing

|     |          |                  |
|-----|----------|------------------|
| REF | 1N40C5-2 | For 1 Test/Box   |
| REF | 1N40C5-4 | For 5 Tests/Box  |
| REF | 1N40C5-6 | For 20 Tests/Box |

Please follow the instruction leaflet carefully.

**INTENDED USE**  
Rapid SARS-CoV-2 Antigen Test Card is an immunochromatography based one step in vitro test. It is designed for the rapid qualitative determination of SARS-CoV-2 virus antigen in **anterior nasal swabs** from individuals suspected of COVID-19 within the first seven days of symptom onset. Rapid SARS-CoV-2 Antigen Test Card shall not be used as sole basis to diagnose or exclude SARS-CoV-2 infection. Children under 14 years of age should be assisted by an adult.

The novel coronavirus belongs to the  $\beta$  genus. COVID-19 is an acute respiratory infectious disease. People are generally susceptible. Currently, the patients infected by the novel coronavirus are the main source of infection, asymptomatic infected people can also be an infectious source. Based on the current epidemiological investigation, the incubation period is 1 to 14 days, mostly 3 to 7 days. The main manifestations include fever, fatigue and dry cough. Nasal congestion, runny nose, sore throat, myalgia and diarrhea are found in a few cases.

#### MATERIALS PROVIDED

| Components                                             | For 1 Test/Box | For 5 Tests/Box | For 20 Tests/Box |
|--------------------------------------------------------|----------------|-----------------|------------------|
| Rapid SARS-CoV-2 Antigen Test Card (sealed foil pouch) | 1              | 5               | 20               |
| Swab                                                   | 1              | 5               | 20               |
| Extraction tube                                        | 1              | 5               | 20               |
| Sample extraction buffer                               | 1              | 5               | 20               |
| Instructions for use (this leaflet)                    | 1              | 1               | 1                |
| Tube stand                                             | 1 (packaging)  | 1               | 1                |

**PERFORMANCE (SENSITIVITY AND SPECIFICITY)**  
Rapid SARS-CoV-2 Antigen Test Card was compared to the confirmed clinical diagnosis. The Study involved 156 samples.

|             |        |
|-------------|--------|
| Sensitivity | 96.77% |
| Specificity | 99.20% |
| Accuracy    | 98.72% |

A feasibility study demonstrated that:

- 99.10% of non-professionals carried out the test without requiring assistance
- 97.8% of the different types of results were interpreted correctly

#### INTERFERENCES

The following substances at the tested concentration showed any interference with the test.

|                              | Alkalot: 10%        | Mucin: 2%                         |
|------------------------------|---------------------|-----------------------------------|
| Whole Blood: 1%              | Tobramycin: 0.0004% | Oxymetazoline: 15%                |
| Phenylephrin: 15%            | Cromolyn: 15%       | Benzocaine: 0.15%                 |
| Menthol: 0.15%               | Mupirocin: 0.25%    | Zincam Nasal Spray: 5%            |
| Fluticasone Propionate: 5%   | sodium chloride: 5% | Human Anti-mouse Antibody (HAMA): |
| Oseeltamivir Phosphate: 0.5% | Biotin: 1200 ng/ml  | 60 ng/ml.                         |

#### IMPORTANT INFORMATION BEFORE THE EXECUTION

- Read this instruction guide carefully.
- Do not use the product beyond the expiration date.
- Do not use the product if the pouch is damaged or the seal is broken.
- Store the test device at 4 to 30°C in the original sealed pouch. Do Not Freeze.
- The product should be used at room temperature (15°C to 30°C). If the product has been stored in a cool area (less than 15°C), leave it at normal room temperature for 30 minutes before using.
- Handle all specimens as potentially infectious.
- adequate or inappropriate specimen collection, storage, and transport may yield inaccurate test results.
- Use the swabs included in the test kit to ensure optimal performance of the test.
- Correct specimen collection is the most important step in the procedure. Make sure to collect enough specimen material (nasal secretion) with the swab, especially for anterior nasal sampling.
- Blow the nose several times before collecting specimen.
- The specimens should be tested as soon as possible after collection.
- Apply the drops of test specimen only to the specimen well (S).
- Too many or too few drops of extraction solution can lead to an invalid or incorrect test result.
- When used as intended, there should not be any contact with the extraction buffer. In case of contact with skin, eyes, mouth or other parts, rinse with clear water. If an irritation persists, consult a medical professional.
- Children under 14 years of age should be assisted by an adult.

#### LIMITATIONS

- The test is to be used exclusively for the qualitative detection of SARS-CoV-2 viral antigen in anterior nasal swab specimens. The exact concentration of SARS-CoV-2 viral antigen cannot be determined as part of this test.
- Proper specimen collection is critical. Failure to follow the procedure may result in inaccurate test results. Improper collection, storage, or even freezing and thawing of the specimen can lead to inaccurate test results.
- If the viral load of the specimen is below the detection limit of the test, the test may produce a negative result.
- As with all diagnostic tests, a definitive clinical diagnosis should not be based on the result of a single test, but should be made by the physician after evaluation of all clinical and laboratory results.
- A negative result does not exclude viral infection except for SARS-CoV-2 and should be confirmed by molecular diagnostic methods if COVID-19 is suspected.

- A positive result does not exclude coinfection with other pathogens.
- The SARS-CoV-2 rapid antigen test can detect both viable and non-viable SARS-CoV-2 material. The performance of the SARS-CoV-2 rapid test is dependent on viral load and may not correlate with other diagnostic methods performed on the same specimen.
- Users should test specimens as soon as possible after specimen collection and within two hours of specimen collection.
- Sensitivity for nasal or oropharyngeal swabs may be lower than nasopharyngeal swabs. It is recommended to use the nasopharyngeal swab specimens by healthcare professionals.
- Monoclonal antibodies may fail to detect, or detect with less sensitivity, SARS-CoV-2 viruses that have undergone minor amino acid changes in the target epitope region.
- The amount of antigen in a sample may decrease as the duration of illness increases. Specimens collected after day 5-7 of illness are more likely to be tested negative compared to a RT-PCR assay.
- The kit was validated with the assorted swabs. Use of alternative swabs may result in false negative results.
- The validity of Rapid SARS-CoV-2 Antigen Test Card has not been proven for identification/confirmation of tissue culture isolates and should not be used in this capacity.

- Cross-reactivity of the Test Device was evaluated by testing viruses and other microorganisms. The final test concentrations of viruses and other microorganisms are documented in the Cross-Reactivity-Study. The therein following viruses and other microorganisms except the Human SARS-coronavirus have no effect on the test results of the Test Device. Positive test results do not rule out co-infections with other pathogens. Possible results may occur in cases of infection with SARS-CoV.

#### PREPARATION

- Clear, clean and dry a flat surface.
- Check the test kit contents. Make sure that nothing is damaged or broken.
- Timer at hand.
- Blow your nose several times before collecting specimen.
- Wash hands.

#### DISPOSAL

The test kit may be disposed of with normal household waste in accordance with the applicable local regulations.

#### PROCEDURE

This test is suitable for people of all ages. The recommended operators are aging from 14 to 90. Children under 14 years of age should be tested by an adult. Do not continue the test if the child feels any pain.

- Rotate the lid of sample extraction buffer bottle.  
**Caution: Open it away from your face and be careful not to spill any of the liquid.**
- Squeeze all extraction buffer out of the bottle into the extraction tube.  
**Caution: Avoid touching the bottle against the tube.**
- Find the swab in the sealed wrapper in front of you. Identify the soft, fabric tip of the swab.
- Peel open the swab packaging and gently take out the swab.  
**Caution: Never touch the soft, fabric tip of the swab with your hands.**
- Carefully insert swab into one nostril. The swab tip should be inserted no less than 2.5 cm (1 inch) from the edge of the nostril. Roll swab 3-4 times along the mucosa inside the nostril. Leave swab in the nostril for several seconds. Using the same swab, repeat this process for the other nostril. Withdraw swab from the nasal cavity.  
**Caution: This may feel uncomfortable. Do not insert the swab any deeper if you feel strong resistance or pain.**
- Place swab into extraction tube. Roll swab three to five (3-5) times. Leave swab in extraction buffer for 1 minute.
- Pinch extraction tube with fingers and remove the solution from swab as much as possible.
- Invert the extraction tube and add 3 drops (about 75 µL) of test specimen into the specimen well (S) by gently squeezing the extraction tube.  
**Caution: The formation of air bubbles in the specimen well (S) must be avoided.**
- Read the results at 15-20 minutes.  
**Caution: Results after 20 minutes may not be accurate. The used device may be disposed of with normal household waste in accordance with the applicable local regulations.**

#### INTERPRETATION OF RESULTS

**Positive:**  
If two colored bands appear with one colored band in the Control Zone (C) and another in the Test Zone (T) within 15-20 minutes, the test result is positive.  
**Caution: No matter how faint the colored bands in the Test Zone (T), the result should be considered as positive.**

**Negative:**  
If one colored band appears in the Control Zone (C) and no colored band appears in the Test Zone (T) within 15-20 minutes, the test result is negative.

**Invalid:**  
If no color line appears in the control area (C) within 15-20 minutes, the test is invalid. Repeat the test with a new test card.

**Invalid**  
The control line is an integrated reagent and is used to control the procedure. The control line appears when the test has been performed correctly and the reagents are reactive.

#### FREQUENTLY ASKED QUESTIONS (FAQ)

- How does the detection work?**  
The reaction of the SARS-CoV-2 virus reacts with the stripe-like coating of the test line and, if present, results in a color change, i.e. a red line appears. Therefore, if the sample does not contain any viral proteins or antigens, there will be no red test line (T).
- When should/can I test myself?**  
You can test yourself whether you have symptoms or not. Studies show that earlier testing within the first 4 days of illness typically means a higher viral load, which is easier to detect. Since the test result is a snapshot in time, testing should be repeated as recommended by local authorities.
- What can affect my test result? What should I pay attention to?**  
Be sure to blow your nose multiple times before collecting the specimen.  
Be sure to visibly collect sample material (nasal secretions).  
Perform the test immediately after taking the specimen.  
Follow the instructions for use carefully.  
Apply the drops of extraction solution only to the sample well (S)  
Too many or too few drops of extraction solution can lead to an invalid or incorrect test result.  
The used device may be disposed of with normal household waste in accordance with the applicable local regulations.  
Please note that the test card should not be used with more than 3 drops of sample, as the liquid absorption of the test strip is naturally limited. If the control line does not appear or the test strip is badly smudged or discolored, making it unreadable, please repeat the test according to the instructions.  
When taking the test, please do not touch the test strip.  
Your test result is invalid. Observe the answer to question 4 and repeat the test according to the instructions for use.
- I am unsure about reading the result. What should I do?**  
For the result to be positive, 2 straight horizontal lines must be clearly visible with the full width of the cassette. If you are still unsure about the results, contact the nearest health facility according to the recommendations of your local authorities.
- My result is positive. What should I do?**  
If your result is positive and the test kit clearly indicates the control line as well as the test line, you should contact the nearest medical facility as recommended by your local authorities. Your test result may be double-checked and the authority or facility will explain the appropriate next steps.
- My result is negative. What should I do?**  
If the test kit only clearly shows the control line, this may mean that you are negative or that the viral load is too low to be detected. If you experience symptoms (headache, fever, myalgia, loss of sense of smell or taste, etc.), please consult your primary care physician, or the nearest health care facility as you are not sure, you can repeat the test.
- How can I dispose of the product?**  
The test kit may be disposed of with normal household waste in accordance with the applicable local regulations.

#### ACCESSORIES:

| Accessory | Manufacturer                                                                                                                         | EC-Representative                                                                                    | CE-Mark               |
|-----------|--------------------------------------------------------------------------------------------------------------------------------------|------------------------------------------------------------------------------------------------------|-----------------------|
| Swab A    | Jiangsu Changfeng Medical Industry Co., Ltd.<br>Toujiuqiao Town, Guangling District Yangzhou 225109<br>Jiangsu P.R. China            | Lins Service & Consulting GmbH<br>Obere Seegasse 34/2,69124<br>Heidelberg Germany                    | 197<br>acc. 93/42/EEC |
| Swab B    | Goodwood Medical Care Ltd.<br>1-2 Floor, 3-919 Yonzheng Street Jinzhou District Dalian<br>116100 Liaoning China                      | CMC Medical Devices & Drugs S.L.<br>C/ Horacio Lengua No18, CP 29006,<br>Málaga, Spain               | 197<br>acc. 93/42/EEC |
| Swab C    | Zhejiang Gongdong Medical Technology Co., Ltd.<br>No. 10 Beiyuan Ave., Huangyan<br>318020 Taizhou, Zhejiang, P.R.China               | Shanghai International Holding Corp.<br>GmbH (Europe)<br>Eiffelstrasse 80, 20537 Hamburg,<br>Germany | 123<br>acc. 93/42/EEC |
| Swab D    | Jiangsu Hanheng Medical Technology Co.,Ltd.<br>16-84#1 North Qingyang Road, Tiaanning District, 213017,<br>Changzhou, Jiangsu, China | Luxus Lebenswelt GmbH<br>Kochstr. 1, 47877, Willich, Germany                                         | 197<br>acc. 93/42/EEC |

#### EXPLANATION FOR SYMBOLS

|  |                                                                      |                                  |                                      |
|--|----------------------------------------------------------------------|----------------------------------|--------------------------------------|
|  | In Vitro Diagnostics Use                                             | See Instructions for Use         | Expiry Date                          |
|  | Tests per Kit                                                        | Keep dry                         | Batch Number                         |
|  | Authorized Representative                                            | Keep away from sunlight          | Manufacturer                         |
|  | Do not reuse                                                         | Do not use if package is damaged | Store between 4-30°C                 |
|  | CE Mark                                                              | Catalogue Number                 | Warning, please refer to instruction |
|  | REF                                                                  |                                  |                                      |
|  | H317: Warning! Liquid component may cause an allergic skin reaction. |                                  |                                      |

|                      |                                                                                                                       |                                   |                                                                                     |
|----------------------|-----------------------------------------------------------------------------------------------------------------------|-----------------------------------|-------------------------------------------------------------------------------------|
| <b>Manufacturer:</b> | Xiamen Boson Biotech Co., Ltd.<br>90-94 Tianfeng Road, Jimei North Industrial Park, Xiamen, Fujian, 361021, P.R.China | <b>Authorized Representative:</b> | Lotus NL B.V.<br>Koningin Julianaplein 10, 1e Verd, 2595AA, The Hague, Netherlands. |
| <b>Version:</b> 5.1  | <b>Date:</b> April 25nd, 2021                                                                                         |                                   |                                                                                     |

#### Polski / Polish

### SZYBKIE TEST ANTYPENOWY W KIERUNKU SARS-COV-2

|     | Wyrob do samokontroli | Dla 1 testu/pudełka | Dla 5 testów/pudełek | Dla 20 testów/pudełek |
|-----|-----------------------|---------------------|----------------------|-----------------------|
| REF | 1N40C5-2              |                     |                      |                       |
| REF | 1N40C5-4              |                     |                      |                       |
| REF | 1N40C5-6              |                     |                      |                       |

Należy postępować zgodnie z instrukcją.

#### PRZEZNACZENIE

Szybki test w kierunku SARS-CoV-2 jest immunochromatograficznym, jednopostopowym testem in vitro. Jest przeznaczony do szybkiego jakościowego wykrywania antygenu wirusa SARS-CoV-2 w wymazach z przedniej części nosa i osób z podejrzeniem zakażenia COVID-19 w ciągu pierwszych siedmiu dni od wystąpienia objawów. Szybki test na obecność antygenu SARS-CoV-2 nie powinien być stosowany jako jedyna metoda diagnozowania lub wykluczania zakażenia wirusem SARS-CoV-2. Dzieci poniżej 14 r.ż. powinny wykonywać test z pomocą osób dorosłych.

#### PODSUMOWANIE

Nowe koronawirusy należą do  $\beta$ -koronawirusów. COVID-19 to zakażenie, ostro choroba dróg oddechowych. Ludzie są na nią generalnie podatni. Obecnie najczęstsze źródło zakażeń wzrastają pacjenci nowym koronawirusem, chociaż źródłem zakażenia mogą być również osoby przechodzące infekcję bezobjawowo. Z aktualnych badań epidemiologicznych wynika, że okres inkubacji wynosi od 1 do 14 dni, jednak najczęściej od 3 do 7 dni. Objawy objawiają się gorączką, uczuciem zmęczenia, utratą wagi i smaku oraz suchy kaszel. W niektórych przypadkach zaobserwowano także takie objawy jak zatępiły nos, wodnisty katar, ból gardła, bole mięśniowe i biegunka.

#### ELEMENTY ZESTAWU

| Części składowe                                                                         | Dla 1 testu/pudełka | Dla 5 testów/pudełek | Dla 20 testów/pudełek |
|-----------------------------------------------------------------------------------------|---------------------|----------------------|-----------------------|
| Antygenowy test kaselkowy w kierunku SARS-CoV-2 (zapieczony/zwolany opakowanie foliowe) | 1                   | 5                    | 20                    |
| Sterylna wymazówka                                                                      | 1                   | 5                    | 20                    |
| Probówka                                                                                | 1                   | 5                    | 20                    |
| Roztwór ekstrakcyjny                                                                    | 1                   | 5                    | 20                    |
| Instrukcja (mniejsza ulotka)                                                            | 1                   | 1                    | 1                     |
| Stojak na probówkę                                                                      | 1 (w pudełku)       | 1                    | 1                     |

#### SKUTECZNOŚĆ (CZUŁOŚĆ I SWOISTOŚĆ)

Przeprowadzono porównanie Rapid SARS-CoV-2 Antigen Test Card z potwierdzoną diagnozą kliniczną. Badanie przeprowadzono na 156 próbkach.

|            |        |
|------------|--------|
| Czułość    | 96.77% |
| Swistość   | 99.20% |
| Dokładność | 98.72% |

Studium wykonalności dało następujące wyniki:  
-99.10% użytkowników nieprofesjonalnych wykonało test samodzielnie  
-97.87% wyników różnego typu zinterpretowano poprawnie

#### SUBSTANCJE INTERFERUJĄCE

Zadna z poniższych substancji w badanym stężeniu nie interferuje z wynikami testu.

|                               | Alkalot: 10%         | Mucyna: 2%                              |
|-------------------------------|----------------------|-----------------------------------------|
| Krew pełna: 1%                | Tobramycyna: 0.0004% | Oksymetazolina: 15%                     |
| Fenylefrylina: 15%            | Kromoglicyna: 15%    | Benzocaina: 0.15%                       |
| Menthol: 0.15%                | Mupirocyna: 0.25%    | Spray do nosa Zicam: 5%                 |
| Flutikazon propionian: 5%     | Chlorek sodu: 5%     | Ludzkie anti-mysie przeciwciała (HAMA): |
| Fosforan oseteltamiviru: 0.5% | Biotyn: 1200 ng/ml   | 60 ng/ml                                |

#### WAŻNE INFORMACJE PRZED POBIERANIEM WYMAZU

- Dokładnie przeczytaj niniejszą instrukcję.
- Nie używaj produktu po upływie daty przydatności.
- Nie używaj produktu, jeśli foliowe opakowanie jest uszkodzone lub otwarte.
- Test przechowywać w temp. od 4 do 30°C w zapieczonym/zwolonym opakowaniu oryginalnym. Nie zamrażać.
- Produkt powinien być używany w temperaturze pokojowej (od 15°C do 30°C). Jeśli produkt był przechowywany w niższej temp. (poniżej 15°C), co najmniej 30 minut przed użyciem umieścić go w temp. pokojowej.
- Wszystkie pobrane próbki należy traktować jako potencjalnie zakaźne.
- Brak należytej dokładności podczas pobierania, przechowywania i transportu wymazów może skutkować niedokładnymi wynikami testów.
- Abby zapewnić optymalne warunki wykonania testu, należy użyć wymazówki zawartej w zestawie.
- Poprawne pobranie wymazu jest najważniejszym etapem przeprowadzania testu. Zwracać uwagę na zebranie wacikiem dostatecznej ilości materiału do badania (wydzieliny z nosa), zwłaszcza w przypadku wymazu pobieranego w przednim odcinku jamy nosowej.
- Przed pobraniem wymazu kilkakrotnie wydmuchać nos.
- Wymaz powinien zostać przebadany jak najszybciej po pobraniu.
- Roztwór do badania z probówki należy wkręcić jedynie w zagłębienie kaselki testowej (S). Zbyt duża lub zbyt mała ilość kropli roztworu ekstrakcyjnego może spowodować, że nie będzie można uzyskać ważnego wyniku testu bądź będzie on zafałszowany.
- W przypadku użycia zgodnie z przeznaczeniem nie powinno dąć do kontaktu z buforem ekstrakcyjnym. W razie kontaktu ze skórą, oczami, jamą ustną lub innymi częściami ciała, opłukać czystą wodą. Jeśli podrażnienie utrzymuje się, należy skonsultować się z lekarzem.

#### OGROZNICZENIA:

- Niniejszy test jest przeznaczony wyłącznie do jakościowego wykrywania antygenu wirusa SARS-CoV-2 w wymazie z nosa (z przedniej części nosa). W ramach tego testu nie można określić stężenia antygenu SARS-CoV-2.
- Decydującym znaczeniem są poprawne pobranie wymazu. Nieprzestrzeganie zasad przeprowadzania testu może powodować niedokładne wyniki. Nieprawidłowe pobranie, przechowywanie lub zamrożenie, a następnie rozmrózzenie materiału wymazowego może sprawić, że uzyskany wynik będzie niedokładny.
- Jeżeli poziom antygenu w próbce jest poniżej granicy wykrywalności testu, może on dać wynik ujemny.
- Tak jak w przypadku wszystkich testów diagnostycznych końcówce rozpoznać kliniczne nie powinno bazować na wyniku pojedynczego testu, lecz zostać potwierdzone przez lekarza po przeanalizowaniu pełnego spektrum wyników badań fizykalnych i laboratoryjnych.
- Ujemny wynik testu nie wyklucza infekcji wirusem SARS-CoV-2 i w przypadku podejrzenia COVID-19 musi zostać potwierdzony metodami diagnostyki molekularnej.
- Dotadli wynik testu nie wyklucza współzakażenia innymi patogenami.
- Szybki test antygenowy w kierunku SARS-CoV-2 jest w stanie wykrywać zarówno żywe, jak i niezżywe komórki SARS-CoV-2. Skuteczność szybkiego testu na SARS-CoV-2 zależy od stężenia antygenu i nie musi korelować z innymi metodami diagnostycznymi, którymi przebadano tę samą próbkę.
- Użytkownicy powinni zebrać próbkę jak najszybciej po pobraniu wymazu, a najpóźniej w ciągu dwóch godzin od pobrania.
- Zwiększa testu w przypadku wymazów z nosa i gardła może być niższa niż w przypadku wymazów z nosogardła.
- Zaleca się zastosowanie metody wymazu z nosogardła, wykonanego przez personel medyczny.
- Przezwalcia monoklonalne, które doświadczają niewielkich zmian aminokwasów w dobowej nomenklaturze antygenowej, mogą nie pozwalać na wykrycie wirusów SARS-CoV-2 lub obniżyć czułość wykrywania.
- Stężenie antygenu w pobranym wymazie może spaść w kolejnych dniach trwania choroby. Wymazy pobrane od 5 do 7 dnia choroby dadzą – porównując z testami RT-PCR – z dużym prawdopodobieństwem ujemny wynik ujemny.
- Ważnością zestawu przeprowadzono z uwzględnieniem dołączonych wymazówek. Zastosowanie innych wymazówek może dać wynik fałszywie ujemny.
- Widność szybkiego testu na obecność antygenu SARS-CoV-2 nie została potwierdzona dla identyfikacji/weryfikacji izolatów z hodowli komórkowej i nie należy używać testu do tej własności.
- Reaktywność krzyżowa kaselki testowej została przebadana na podstawie testowania próbek wirusów i innych mikroorganizmów. Ostateczne stężenia testowe wirusów i innych mikroorganizmów podano w dokumentacji badania reaktywności krzyżowej. Wymienione tam wirusy i inne mikroorganizmy, z wyjątkiem ludzkiego koronawirusa SARS, nie mają wpływu na wynik testu kaselkowego. Dodani wynik testu nie wyklucza współzakażenia innymi patogenami. Wynik dodatni może wystąpić w przypadku zakażenia SARS-CoV.

#### PRZYGOTOWANIE

- Zestaw umieścić na czystej i suchej powierzchni.
- Skontrolować zawartość zestawu.
- Upewnić się, że za deno element nie jest uszkodzony ani przetrwany.
- Przygotować stópek.
- Przed pobraniem wymazu kilkakrotnie wydmuchać nos.
- Umycie rąk.

#### UTYLIZACJA

Zestaw diagnostyczny można utylizować za zwykłymi odpadami komunalnymi, przestrzegając lokalnych zasad gospodarki odpadami.

#### WYKONYWANIE TESTU:

- Otworzyć ampulkę z roztworem ekstrakcyjnym.  
**UWAGA: Ampułkę otwierać z dala od twarzy, uważając, aby nie rozlać płynu.**
- Całą zawartość ampulki z roztworem wycisnąć do probówki.  
**UWAGA: Nie dopuszczać do zetknięcia obu pojemników.**
- Złokalizować wymazówkę umieszczoną w zaklejonym opakowaniu. Wycisnąć palcami miękką wacik znajdujący się na końcu wymazówki.
- Otworzyć opakowanie i ostrożnie wyjąć wymazówkę.  
**UWAGA: Starać się nie dotykać wacika rękami.**
- Ostrożnie wprowadzić wymazówkę do nosa. Kołozówka wymazówki powinna zostać wprowadzona co najmniej na głębokość 2,5 cm od krawędzi dziurki nosa. Obracać palcami przy słuzówce w kierunku nosa, aby na pewno zebrać zarówno śluz jak i komórki. Obrócić wymazówkę 3-4 razy. Pozostawić wymazówkę na kilka sekund w miejscu nosa. Przy użyciu tej samej wymazówki powtórzyć proces w drugiej dziurce.  
**UWAGA: Pobieranie wymazu może powodować uczucie dyskomfortu. Jeśli pojawi się silny opór lub ból, nie wprowadzać wymazówki głębiej.**
- Wymazówkę wraz z pobranym materiałem umieścić w probówce. Następnie obrotami wymazówkę od trzecz do pięciu (3-5) razy. Pozostawić wymaz na 1 minutę w buforze ekstrakcyjnym.
- Podczas wyjmowania wymazówki w celu jej zutylizowania, ścisnąć probówkę palcami tak, by usunąć z wymazówki jak największą ilość roztworu.
- Złokalizować nasadkę wyposażoną w krompiemierz.
- Przed wyjmowaniem testu wszystkie komponenty z zestawu muszą osiągnąć temperaturę pokojową. Otworzyć opakowanie z kaselką testową. Policzyc kaselkę testową na płaskim i równym podłożu.  
**UWAGA: Kaselka testowa musi zostać użyta od razu po otwarciu opakowania.**
- Odczekać probówkę i wycisnąć 3 krople badanego roztworu (75 µl) do zagłębienia w kaselce testowej (S), lekko ścisnąć probówkę.  
**UWAGA: Nie należy dopuszczać do tworzenia się pecherzyków powietrza w zagłębieniu kaselki (S).**
-
